# Supplementary material for: First Genomic Evidence of a Henipa-like Virus in Brazil
Source: Preprints.org preprint supplement (doi:10.20944/preprints202208.0339.v1), 2022-08-18
Supplement: Supplementary file 1 [file Supplementary Figure.docx]

**Supplementary Figure**


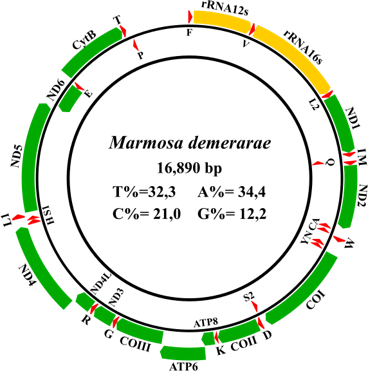


**Figure S1.** Structural representation of *Marmosa demerarae* mitochondrial DNA. Internal values indicate the content of the nucleotide bases. Yellow, green, and red blocks indicate rRNAs, PCGs, and tRNAs, respectively.
