# Supplementary material for: First Genomic Evidence of a Henipa-like Virus in Brazil
Source: Preprints.org preprint supplement (doi:10.20944/preprints202208.0339.v1), 2022-08-18
Supplement: Supplementary file 2 [file Supplementary Tables.xlsx]

## Sheet: Table S1
		Table S1: Description of Marmosa demerarae mitochondrial genes.
		Abbreviation	Gene	Sense	Position
		rRNA12s	12S ribosomal RNA	Forward	0070-1023
		rRNA16s	16S ribosomal RNA	Forward	1094-2666
		ND1	NAD 1	Forward	2742-3697
		ND2	NAD 2	Forward	3903-4943
		COI	Cytochrome c oxidase I	Forward	5398-6939
		COII	Cytochrome c oxidase II	Forward	7084-7768
		ATP8	ATP synthase 8	Forward	7830-8039
		ATP6	ATP synthase 6	Forward	7994-8674
		COIII	Cytochrome c oxidase III	Forward	8671-9457
		ND3	NAD 3	Forward	9526-9871
		ND4L	NAD 4L	Forward	9942-10238
		ND4	NAD 4	Forward	10232-11609
		ND5	NAD 5	Forward	11807-13609
		ND6	NAD 6	Reverse	14110-13610
		CytB	Cytochrome b	Forward	14182-15330
		F	Phenylalanine	Forward	0001-0069
		V	Valine	Forward	1024-1093
		L2	Leucine	Forward	2667-2740
		I	Isoleucine	Forward	3698-3766
		Q	Glutamine	Reverse	3834-3764
		M	Methionine	Forward	3834-3902
		A	Alanine	Reverse	5012-4944
		C	Cysteine	Reverse	5098-5030
		W	Tryptophan	Forward	5107-5177
		N	Asparagine	Reverse	5327-5256
		Y	Tyrosine	Reverse	5396-5329
		S2	Serine	Reverse	7011-6943
		D	Aspartate	Forward	7014-7082
		K	Lysine	Forward	7769-7824
		G	Glycine	Forward	9458-9525
		R	Arginine	Forward	9872-9941
		H	Histidine	Forward	11610-11678
		S1	Serine	Forward	11679-11736
		L1	Leucine	Forward	11736-11806
		E	Glutamate	Reverse	14179-14111
		T	Threonine	Forward	15333-15401
		P	Proline	Reverse	15469-15404

## Sheet: Table S2
		Table S2: Genomes included in the multiple alignment and phylogenetic analysis.
		Subfamily	Genus	Species / Virus name	Host	Country	Year	Accession no.
		Orthoparamyxovirinae	Henipavirus	Daeryong virus	Crocidura shantungensis	South Korea	2017	MZ574409
				Jingmen Crocidura shantungensis henipavirus 2	Crocidura shantungensis	China	2016	OM030315
				Melian virus	Crocidura grandiceps	Guinea	2018	OK623353
				Denwin virus	Crocidura russula	Belgium	2019	OK623354
				Wenzhou Apodemus agrarius henipavirus 1	Apodemus agrarius	China	2016	MZ328275
				Mojiang henipavirus	Rattus rattus sladeni	China	2012	NC_025352
				Wufeng Chodsigoa smithii henipavirus 1	Chodsigoa smithii	China	2016	OM030316
				Jingmen Crocidura shantungensis henipavirus 1	Crocidura shantungensis	China	2016	OM030314
				Wufeng Crocidura attenuata henipavirus 1	Crocidura attenuata	China	2016	OM030317
				Gamak virus	Crocidura lasiura	South Korea	2017	MZ574407
				Hendra henipavirus	-	-	-	NC_001906
				Nipah henipavirus	-	-	-	NC_002728
				Ghanaian bat henipavirus	Eidolon helvum	Ghana	2009	NC_025256
				Peixe-Boi virus	Marmosa demerarae	Brazil	2015	MZ615319
			Jeilongvirus	Beilong jeilongvirus	-	-	-	NC_007803
				Tailam jeilongvirus	Rattus andamanensis	Hong Kong	2009	NC_025355
				Myodes jeilongvirus	Myodes glareolus	Slovenia	2016	NC_055168
				Jun jeilongvirus	Mus musculus	Australia	-	NC_007454
				Lophuromys jeilongvirus 2	Lophuromys machangui	Mozambique	2011	NC_043540
				Lophuromys jeilongvirus 1	Lophuromys machangui	Mozambique	2011	NC_043539
				Carollia bat paramyxovirus PDF-3308	Carollia perspicillata	Brazil	2014	MZ312420
				Carollia bat paramyxovirus PBZ-1672	Carollia perspicillata	Brazil	2013	MZ312428
				Diaemus bat paramyxovirus PBZ-3205	Diaemus youngi	Brazil	2013	MZ312424
				Diaemus bat paramyxovirus PBZ-2282	Diaemus youngi	Brazil	2013	MZ312426
			Narmovirus	Mossman narmovirus	Wild rat	-	-	NC_005339
				Myodes narmovirus	Myodes glareolus	Russia	1973	NC_055167
				Nariva narmovirus	Zygodontomys brevicauda	Trinidad and Tobago	1962	NC_017937
				Tupaia narmovirus	-	-	-	NC_002199
			Morbillivirus	Measles morbillivirus	-	-	-	NC_001498
				Rinderpest morbillivirus	Cattle	Kenya	-	NC_006296
				Small ruminant morbillivirus	Ovis aries	Turkey	-	NC_006383
				Cetacean morbillivirus	-	-	-	NC_005283
				Canine morbillivirus	-	-	-	NC_001921
				Phocine morbillivirus	Phoca vitulina	Netherlands	1988	NC_028249
				Feline morbillivirus	Felis catus	Hong Kong	2009	NC_039196
			Salemvirus	Salem salemvirus	-	USA	1992	NC_025386
			Respirovirus	Human respirovirus 3	-	-	-	NC_001796
				Simian Agent 10	Cercopithecus mitis	South Africa	1963	NC_038270
				Bovine respirovirus 3	-	-	-	NC_002161
				Caprine respirovirus 3	Goat	China	2013	NC_028362
				Murine respirovirus	-	-	-	NC_001552
				Human respirovirus 1	-	-	-	NC_003461
				Porcine respirovirus 1	Sus scrofa domesticus	Hong Kong	2010	NC_025402
			Aquaparamyxovirus	Salmon aquaparamyxovirus	-	-	-	NC_025360
			Ferlavirus	Reptilian ferlavirus	-	-	-	NC_005084
		Avulavirinae	Metaavulavirus	Avian metaavulavirus 15	Calidris fuscicollis	Brazil	2012	NC_034968
				Avian metaavulavirus 2	Chicken	USA	1956	NC_039230
				Avian metaavulavirus 10	Eudyptes chrysocome	Falkland Islands	2007	NC_025349
				Avian metaavulavirus 8	Branta canadensis	USA	1976	NC_039195
				Avian metaavulavirus 20	Gull	Kazakhstan	2014	NC_040796
				Avian metaavulavirus 7	Columba sp.	USA	1975	NC_025347
				Avian metaavulavirus 11	Gallinago gallinago	France	2010	NC_025407
				Avian metaavulavirus 5	Melopsittacus undulatus	Japan	1974	NC_025361
				Avian metaavulavirus 14	Duck	Japan	2011	NC_039015
				Avian metaavulavirus 6	Domestic goose	Russia	2003	NC_039194
			Orthoavulavirus	Goose paramyxovirus	-	-	-	NC_005036
				Avian orthoavulavirus 1	Laying duck	China	2008	NC_039223
				Avian orthoavulavirus 16	Wild duck	South Korea	2014	NC_039016
				Avian orthoavulavirus 9	Anas platyrhynchos domesticus	USA	1978	NC_025390
				Avian orthoavulavirus 12	Anas penelope	Italy	2005	NC_025363
				Avian orthoavulavirus 13	Anser sp.	Japan	2000	NC_030231
				Avian orthoavulavirus 17	Pygoscelis papua	Antarctica	2014	NC_039017
				Avian orthoavulavirus 18	Pygoscelis papua	Antarctica	2014	NC_039018
				Avian orthoavulavirus 19	Pygoscelis papua	Antarctica	2014	NC_039019
			Paraavulavirus	Avian paraavulavirus 4	Anas rubripes	USA	2010	NC_019531
				Avian paraavulavirus 3	Turkey	USA	1968	NC_025373
		Rubulavirinae	Pararubulavirus	Tioman pararubulavirus	Pteropus hypomelanus	Malaysia	-	NC_004074
				Teviot pararubulavirus	Pteropus sp.	Australia	2009	NC_039198
				Menangle pararubulavirus	Pteropus alecto	Australia	2009	NC_039197
				Hervey pararubulavirus	Pteropus sp.	Australia	2011	NC_055459
				Achimota pararubulavirus 2	Eidolon helvum	Ghana	2010	NC_025404
				Tuhoko pararubulavirus 1	Rousettus leschenaultii	China	-	NC_025410
				Sosuga pararubulavirus	Homo sapiens	Uganda and South Sudan	2012	NC_025343
				Tuhoko pararubulavirus 3	Rousettus leschenaultii	China	-	NC_025350
				Tuhoko pararubulavirus 2	Rousettus leschenaultii	China	-	NC_025348
				Achimota pararubulavirus 1	Eidolon helvum	Ghana	2010	NC_025403
			Orthorubulavirus	Human orthorubulavirus 2	-	-	-	NC_003443
				Simian orthorubulavirus	-	-	-	NC_006428
				Mammalian orthorubulavirus 5	-	-	-	NC_006430
				Mammalian orthorubulavirus 6	Pteropus sp.	Australia	2011	NC_055508
				Mapuera orthorubulavirus	Sturnira lilium	Brazil	-	NC_009489
				Porcine orthorubulavirus	-	-	-	NC_009640
				Mumps orthorubulavirus	-	-	-	NC_002200
				Bat mumps orthorubulavirus	Epomophorus sp.	DR Congo	2009	NC_038271
				Human orthorubulavirus 4	-	Japan	-	NC_021928
